# Supplementary material
Source: publisher figshare collection journal article supplement (https://frontiersin.figshare.com/ndownloader/files/24475595)
Supplement: Supplementary file [file 24475595]

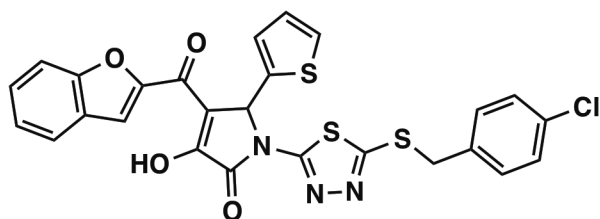

**AF-399**

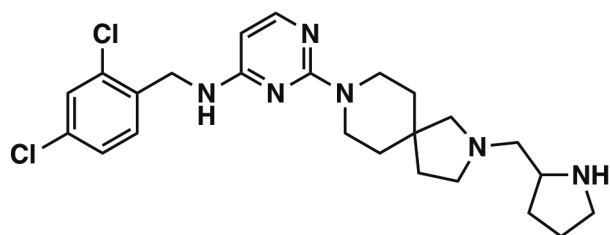

**Compound 18a**

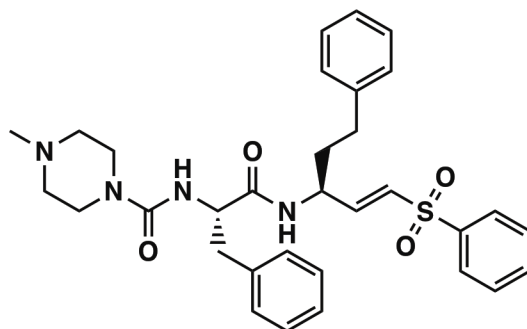

**K777**

**Figure S1.** Chemical Structures of CCR4 antagonists AF-399, compound 18a, and K777.
